# Supplementary material for: The Anti-Inflammatory and the Antinociceptive Effects of Mixed Agrimonia pilosa Ledeb. and Salvia miltiorrhiza Bunge Extract
Source: MDPI journal article supplement (doi:10.3390/plants10061234), 2021-06-17
Supplement: s1 [file s1]

Supplementary information

## The anti-inflammatory and the antinociceptive effects of mixed *Agrimonia pilosa* Ledeb. and *Salvia miltiorrhiza* Bunge extract

Jinghui Feng<sup>1,2,†</sup>, Hyun Yong Kim<sup>3,†</sup>, Su Min Sim<sup>1,2</sup>, Guanglei Zuo<sup>3</sup>, Jeon Sub Jung<sup>2</sup>, Seung Hwan Hwang<sup>3,4</sup>, Youn Gil Kwak<sup>5</sup>, Min Jung Kim<sup>5</sup>, Jeong Hun Jo<sup>5</sup>, Sung Chan Kim<sup>6</sup>, Soon Sung Lim<sup>3,\*</sup> and Hong Won Suh<sup>1,2,\*</sup>

<sup>1</sup> Department of Pharmacology, College of Medicine, Hallym University, 1 Hallymdaehak-gil, Chuncheon, Gangwon-do 24252, Republic of Korea; B17501@hallym.ac.kr (J.H.F.); sumin@hallym.ac.kr (S.M.S.); hwsuh@hallym.ac.kr (H.W.S.)

<sup>2</sup> Institute of Natural Medicine, College of Medicine, Hallym University, 1 Hallymdaehak-gil, Chuncheon, Gangwon-do 24252, Republic of Korea; de3180@hallym.ac.kr (J.S.J.)

<sup>3</sup> Department of Food Science and Nutrition, College of Natural Science, Hallym University, 1 Hallymdaehak-gil, Chuncheon, Gangwon-do 24252, Republic of Korea; khy9514@nate.com (H.Y.K.); B16504@hallym.ac.kr (G.L.Z.); isohsh@gmail.com (S.H.H.); limss@hallym.ac.kr (S.S.L.)

<sup>4</sup> R&D Center, Huons Co., Ltd., 55 Hanyangdaehak-ro, Ansan, Gyeonggi-do 15588, Republic of Korea;

<sup>5</sup> Research Institute, Huons Nature, Geumsan, Choong-cheong Nam-do 32742, Republic of Korea; kyg@huonsnature.com (Y.G.K.); jas.mjkim@gmail.com (M.J.K.); jhjo@huonsnature.com (J.H.J.)

<sup>6</sup> Department of Biochemistry, College of Medicine, Hallym University, 1 Hallymdaehak-gil, Chuncheon, Gangwon-do 24252, Republic of Korea; biokim@hallym.ac.kr

† The authors contributed to the manuscript in equal measure.

\* Co-Correspondence: limss@hallym.ac.kr; Tel.: +82 33 248 2133; and hwsuh@hallym.ac.kr; Tel.: +82-33-248-2614

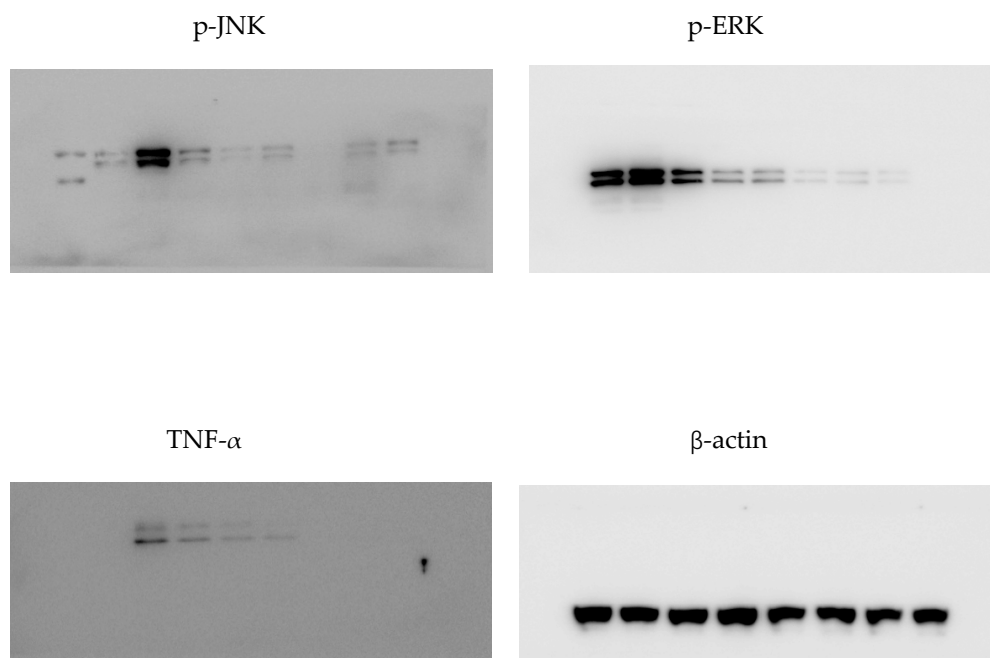

**Supplementary Figure 1.** Representative full-gel images of Western blots in Figure 5A.

p-JNK

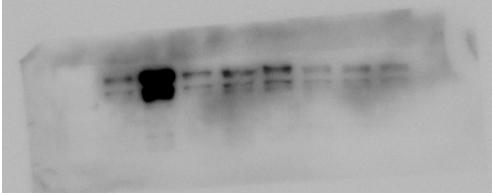

p-ERK

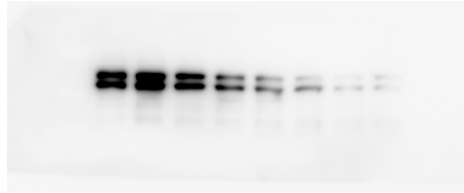

TNF- $\alpha$

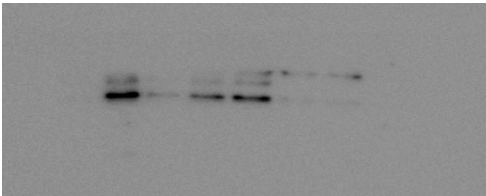

$\beta$ -actin

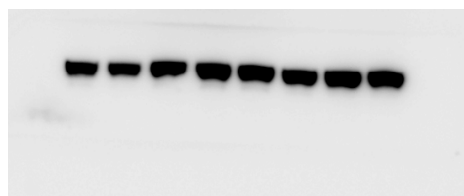

**Supplementary Figure 2.** Representative full-gel images of Western blots in Figure 6A.

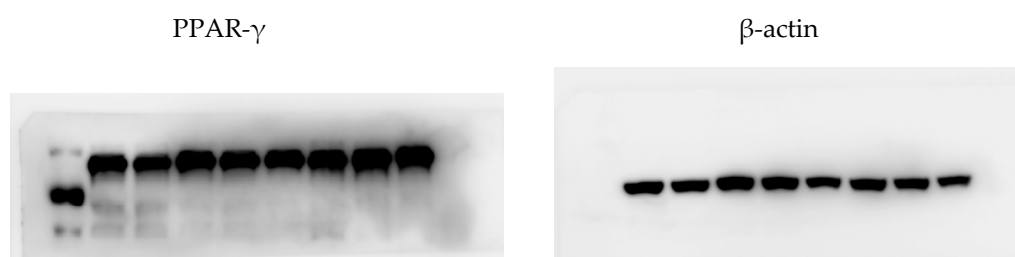

**Supplementary Figure 3.** Representative full-gel images of Western blots in Figure 7A.

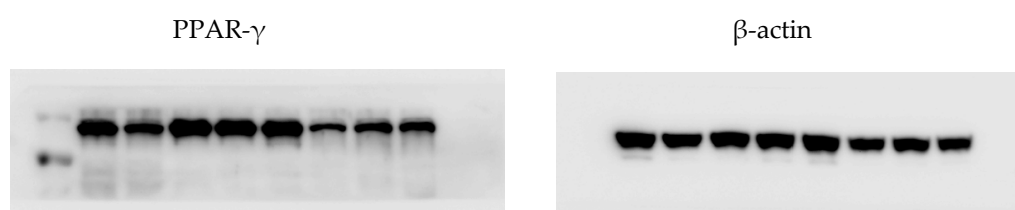

**Supplementary Figure 4.** Representative full-gel images of Western blots in Figure 7B.
